# Supplementary material for: Oct1 and OCA-B are selectively required for CD4 memory T cell function
Source: PubMed Central journal article supplement — J Exp Med. 2015 Nov 16;212(12):2115–31. doi: 10.1084/jem.20150363 (PMC4647264; doi:10.1084/jem.20150363), 2015-11-16
Supplement: supp_jem.20150363_JEM_20150363_sm.pdf [file supp_jem.20150363_JEM_20150363_sm.pdf]

## SUPPLEMENTAL MATERIAL

Shakya et al., <http://www.jem.org/cgi/content/full/jem.20150363/DC1>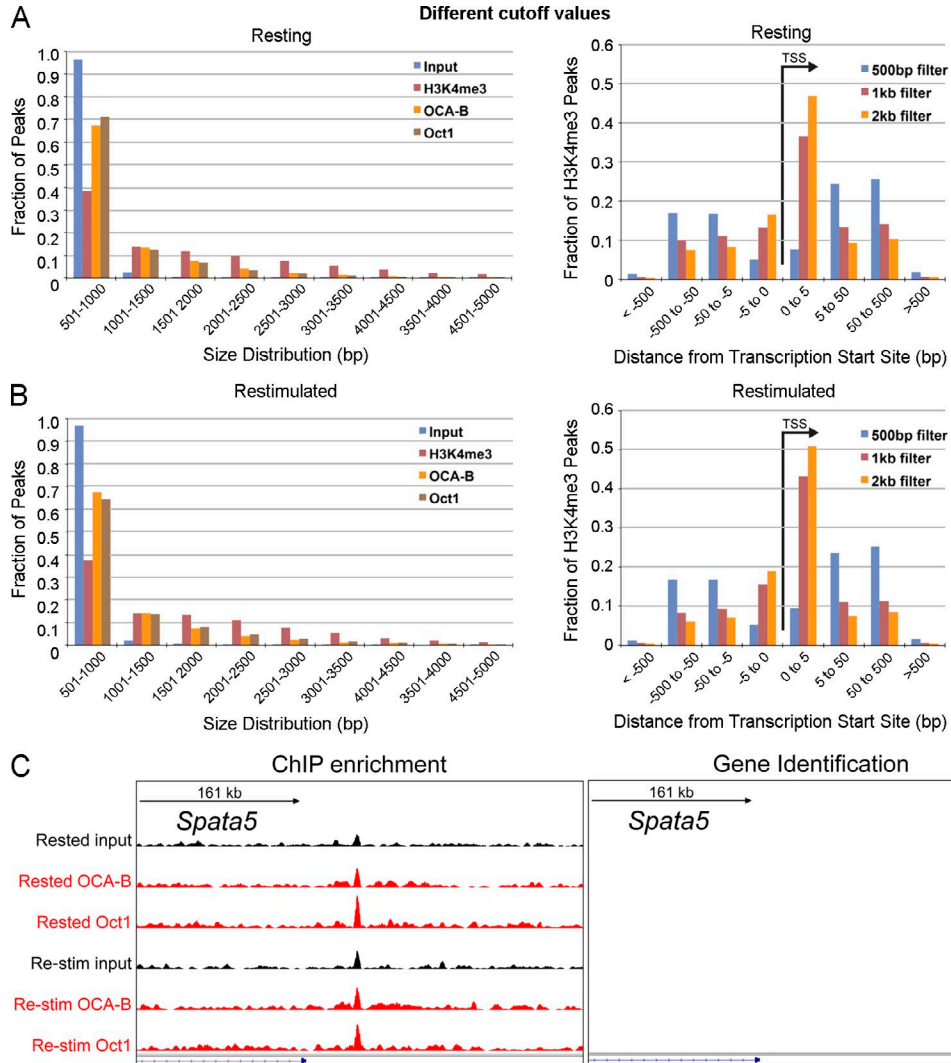

Figure S1. **ChIPseq analysis workflow.** (A) Analysis of ChIPseq enrichment using different values for peak calling comparing input with IP data. Because the longer cross-linker DSG increased the width of spurious background peaks in the ChIPseq data, peak size cutoffs higher than the commonly applied 500-bp limit were required to remove background peaks. 96% of peak calls from the input-DNA ChIPseq data were <1 kb. (B) Analysis of ChIPseq enrichment using different cutoff values in resting and restimulated cells using an H3K4 trimethyl (H3K4me3) antibody and DSG cross-linking. H3K4me3 should enrich for transcription start sites (TSSs). The best enrichment around TSSs was observed with peaks filtered at 2 kb. The OCA-B and Oct1 ChIPseq data were therefore filtered at 2 kb to remove spurious peaks presumably from the DSG cross-linking. (C) IGV images of a spurious peak (present in input) near the *Spata5* gene. Peak calling is shown on the right.

Table S1. Numbers of offspring with the indicated genotype from *Oct1*<sup>-/+</sup> and *Oct1*<sup>fl/+</sup> intercrosses

| Genotype                    | Number of offspring observed (expected) |
|-----------------------------|-----------------------------------------|
| <i>Oct1</i> <sup>-/+</sup>  |                                         |
| +/+                         | 21 (7)                                  |
| -/+                         | 7 (14)                                  |
| -/-                         | 0 (7)                                   |
| Total                       | 28                                      |
| P-value                     | $4.4 \times 10^{-8}$                    |
| <i>Oct1</i> <sup>fl/+</sup> |                                         |
| +/+                         | 15 (11)                                 |
| fl/+                        | 20 (23)                                 |
| fl/fl                       | 10 (11)                                 |
| Total                       | 45                                      |
| P-value                     | 0.38                                    |

P-values are based on  $\chi^2$  test.

**Table S2, included as a separate Excel file, shows normalized RNAseq gene expression changes.**

**Table S3, included as a separate Excel file, shows Oct1/OCA-B target gene identification using ChIPseq.**

**Table S4, included as a separate Excel file, shows Gene Ontology enrichments for ChIPseq data.**
